# Supplementary material
Source: PubMed Central journal article supplement (PMC11029556)
Supplement: 262_2011_1149_MOESM1_ESM.pdf [file 262_2011_1149_MOESM1_ESM.pdf]

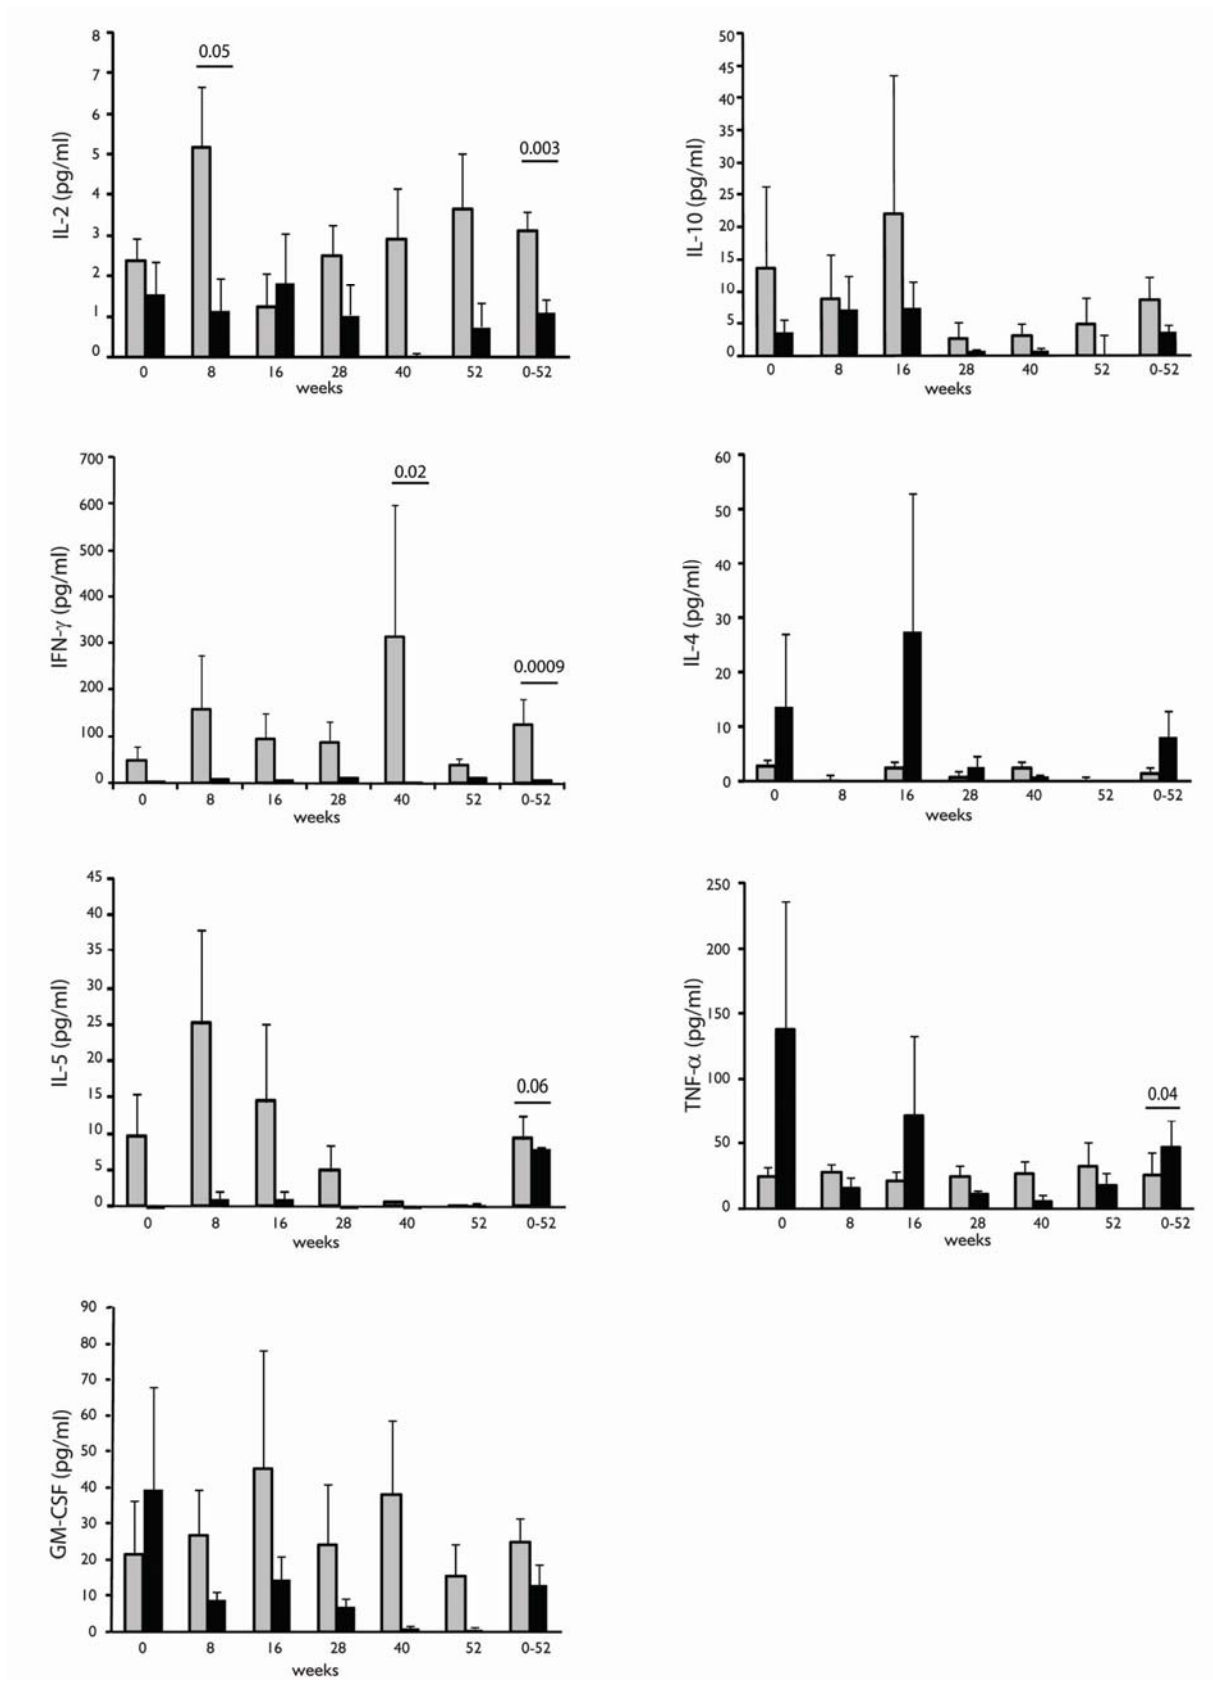

**Figure S1.** Cytokine levels (pg/ml) (mean  $\pm$  SEM) in superantants of a 5-days culture in immune-responders (□) and immune non-responders (■), tested at the the different timepoints\*  $p \leq 0.05$ , \*\*  $p < 0.01$ .

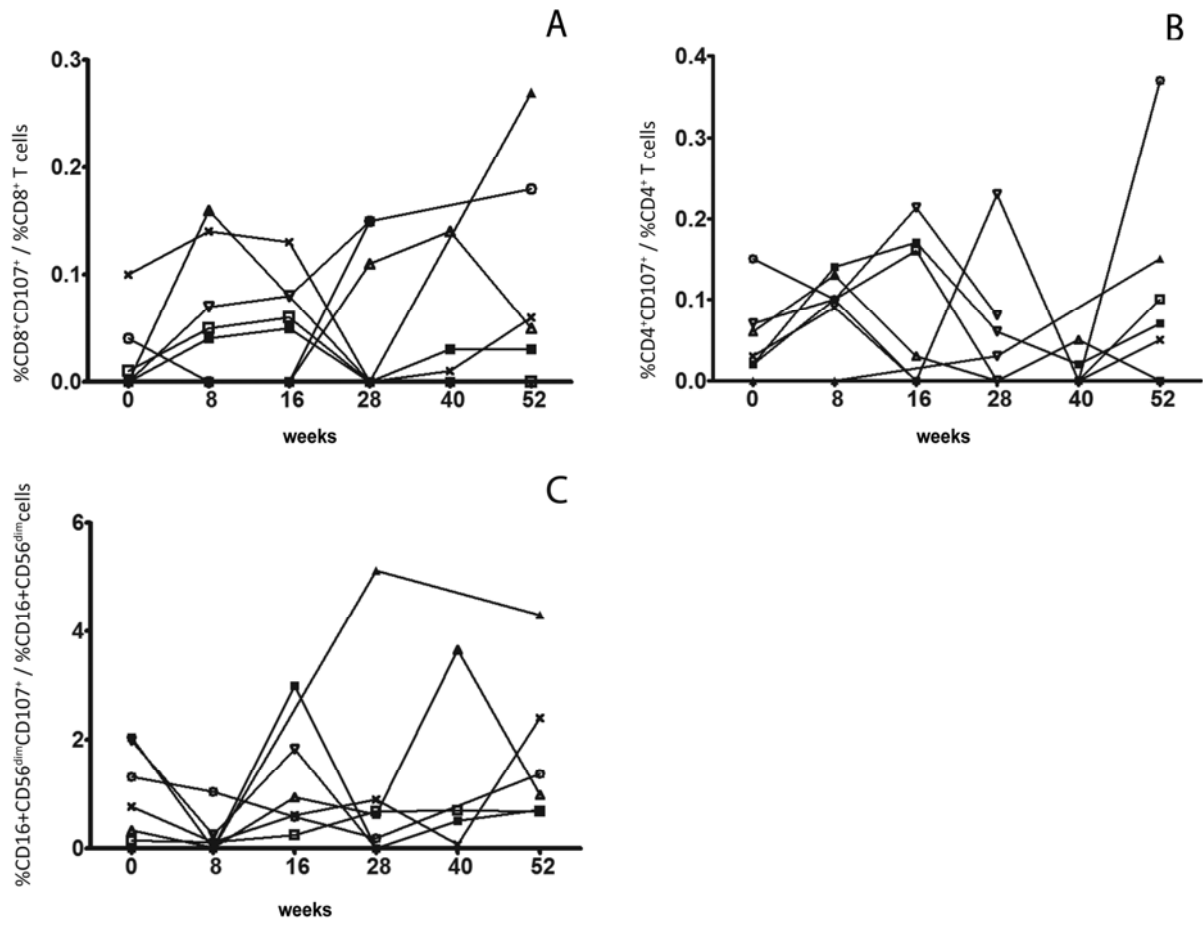

**Figure S2.** Frequency of degranulating CD8<sup>+</sup> (A), CD4<sup>+</sup> (B) T cells and CD16<sup>+</sup>CD56<sup>dim</sup> NK cells (C) (n=8). Cell frequencies were normalized for the percentage of cells in the parent population. Lines represent individual patients.

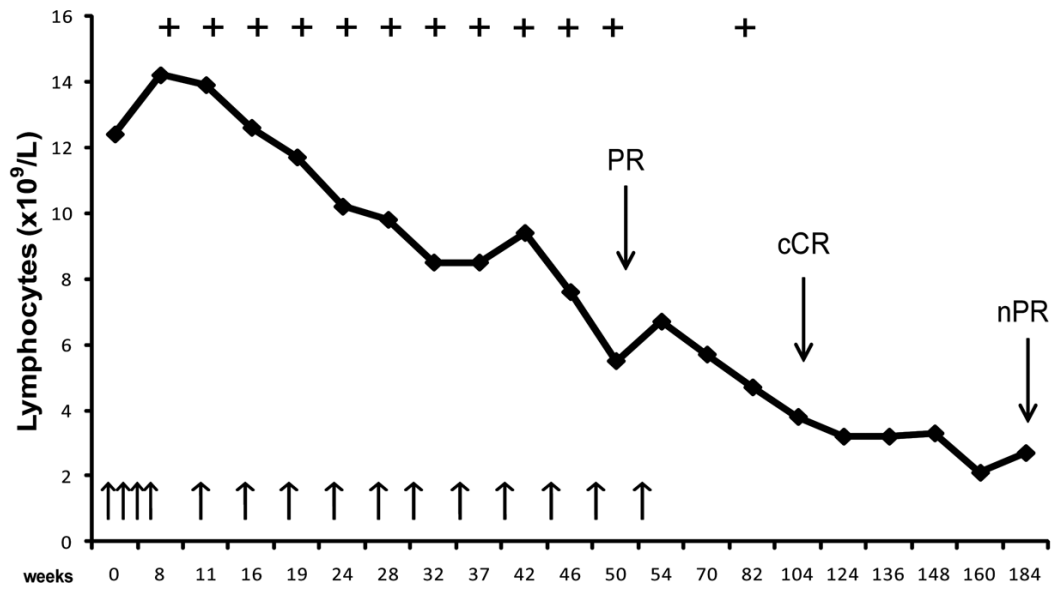

**Figure S3.** Blood lymphocyte count in Pt I-06 vaccinated with Apo-DC alone every two weeks till week 6, then every 4 weeks up to week 22 and after that together with GM-CSF every 4 weeks up to week 52. The lines with arrow heads indicate vaccine injections. (+) indicate vaccine-induced immune response. PR = partial response; cCR = clinical complete response; nPR = nodular partial response.
